# Supplementary material
Source: publisher figshare collection journal article supplement (https://karger.figshare.com/ndownloader/files/14413358)
Supplement: Supplementary file 1 [file 14413358]

## 1. Supplemental Appendix 1

### Medline (Ovid)

1. exp pregnancy/
2. exp conception/
3. exp gestation/
4. exp childbirth/
5. exp foetus/
6. exp fetus/
7. exp Newborn/
8. pregnan\$.tw.
9. gestation\$.tw.
10. (new adj5 born).tw.
11. labo\$.tw.
12. fetal\$.tw.
13. 1 or 2 or 3 or 4 or 5 or 6 or 7 or 8 or 9 or 10 or 11 or 12
14. exp Clinical Trial/
15. exp Cohort Studies/
16. exp Case-control Studies/
17. Prospective Studies/
18. Retrospective Studies/
19. Longitudinal Studies/
20. Follow-up Studies/
21. cohort\$.tw
22. (case\$ adj5 control\$).tw.
23. (longitudinal\$ adj5 stud\$).tw.
24. (follow\$ adj5 stud\$).tw.
25. (retrospective\$ adj5 stud\$).tw.
26. (prospective\$ adj5 stud\$).tw.
27. 14 or 15 or 16 or 17 or 18 or 19 or 20 or 21 or 22 or 23 or 24 or 25 or 26
28. exp Glomerulonephritides, IGA/
29. exp IGA Nephropathy/
30. exp IGA Glomerulonephritis/
31. exp Immunoglobulin A nephropathy/
32. exp Burgers Disease/
33. IGA Glomeruloneph\$.tw.
34. IGA Neph\$.tw.
35. Immunoglobulin A Glumeruloneph\$.tw.
36. Immunoglobulin A Neph\$.tw.
37. Nephropathy, Immunoglobulin A.tw.
38. 28 or 29 or 30 or 31 or 32 or 33 or 34 or 35 or 36 or 37
39. 13 and 27 and 38

### EMBASE

- 1.pregnancy

- 2.conception
- 3.gestation
- 4.fetus
- 5.foetus
- 6.labor
- 7.newborn
- 8.new NEAR/5 born
- 9.childbirth
- 10.labour\*
- 11.pregnan\*
- 12.1 or 2 or 3 or 4 or 5 or 6 or 7 or 8 or 9 or 10 or 11
- 13.clinical trial
- 14.cohort study
- 15.case control study
- 16.prospective study
- 17.retrospective study
- 18.longitudinal study
- 19.follow up study
- 20.prospective\* NEAR/5 stud\*
- 21.retrospective\* NEAR/5 stud\*
- 22.follow\* NEAR/5 stud\*
- 23.longitudinal\* NEAR/5 stud\*
- 24.case\* NEAR/5 control\*
- 25.13 or 14 or 15 or 16 or 17 or 18 or 19 or 20 or 21 or 22 or 23 or 24
- 26.IgA glomerulonephritis
- 27.Immunoglobulin A glomeruloneph\*
- 28.IgA nephropathy
- 29.Immunoglobulin A neph\*
- 30.Bergers disease
- 31.IgA neph\*
- 32.IgA glomeruloneph\*
- 33.Glomerulonephritides, IGA
- 34.26 or 27 or 28 or 29 or 30 or 31 or 32 or 33
- 35.12 and 25 and 34

## **CBM**

检索语句：高级检索（不设年限）

(("IgA 肾小球肾炎" OR "Berger 病" OR "IgA 肾病" OR "免疫球蛋白 A 型肾病" OR "肾小球肾炎, IGA") AND ("怀孕" OR "妊娠" OR "分娩" OR "胎儿分娩" OR "妊娠分娩" OR "分娩")) AND ("妊娠"[不加权:扩展] AND "肾小球肾炎,IGA"[不加权:扩展])

supplement table 1. GRADE assessment of the renal outcomes.

| pregnancy on IgAN for IgA nephropathy                                                                                  |                                          |                                      |                           |                              |                                 |          |
|------------------------------------------------------------------------------------------------------------------------|------------------------------------------|--------------------------------------|---------------------------|------------------------------|---------------------------------|----------|
| Patient or population: patients with IgA nephropathy                                                                   |                                          |                                      |                           |                              |                                 |          |
| Settings:                                                                                                              |                                          |                                      |                           |                              |                                 |          |
| Intervention: pregnancy on IgAN                                                                                        |                                          |                                      |                           |                              |                                 |          |
| Outcomes                                                                                                               | Illustrative comparative risks* (95% CI) |                                      | Relative effect (95% CI)  | No of Participants (studies) | Quality of the evidence (GRADE) | Comments |
|                                                                                                                        | Assumed risk Control                     | Corresponding risk Pregnancy on IgAN |                           |                              |                                 |          |
| pregnancy on IgAN<br>incidence of end-stage kidney disease requiring RRT or doubling of SCr<br>Follow-up: mean 5 years | Study population                         |                                      | OR 0.90<br>(0.59 to 1.37) | 1198<br>(9 studies)          | ⊕⊕⊕⊕<br>very low <sup>1,2</sup> |          |
|                                                                                                                        | 125 per 1000                             | 114 per 1000<br>(78 to 164)          |                           |                              |                                 |          |
|                                                                                                                        | Moderate                                 |                                      |                           |                              |                                 |          |
|                                                                                                                        | 97 per 1000                              | 88 per 1000<br>(60 to 128)           |                           |                              |                                 |          |

\*The basis for the **assumed risk** (e.g. the median control group risk across studies) is provided in footnotes. The **corresponding risk** (and its 95% confidence interval) is based on the assumed risk in the comparison group and the **relative effect** of the intervention (and its 95% CI).

CI: Confidence interval; OR: Odds ratio;

GRADE Working Group grades of evidence  
**High quality:** Further research is very unlikely to change our confidence in the estimate of effect.  
**Moderate quality:** Further research is likely to have an important impact on our confidence in the estimate of effect and may change the estimate.  
**Low quality:** Further research is very likely to have an important impact on our confidence in the estimate of effect and is likely to change the estimate.  
**Very low quality:** We are very uncertain about the estimate.

<sup>1</sup> Of 9 studies, 2 were retrospective studies and 5 were prospective studies, and 2 were not mentioned whether retrospective studies or prospective studies  
<sup>2</sup> Total number of events is less than 300

| pregnancy on IgAN for IgA nephropathy                          |                                          |                                                                                          |                          |                              |                                   |          |
|----------------------------------------------------------------|------------------------------------------|------------------------------------------------------------------------------------------|--------------------------|------------------------------|-----------------------------------|----------|
| Patient or population: patients with IgA nephropathy           |                                          |                                                                                          |                          |                              |                                   |          |
| Settings:                                                      |                                          |                                                                                          |                          |                              |                                   |          |
| Intervention: pregnancy on IgAN                                |                                          |                                                                                          |                          |                              |                                   |          |
| Outcomes                                                       | Illustrative comparative risks* (95% CI) |                                                                                          | Relative effect (95% CI) | No of Participants (studies) | Quality of the evidence (GRADE)   | Comments |
|                                                                | Assumed risk Control                     | Corresponding risk Pregnancy on IgAN                                                     |                          |                              |                                   |          |
| eGFR/CCr<br>Scale from: 0 to 110<br>Follow-up: mean 4.75 years |                                          | The mean egfr/ccr in the intervention groups was<br>3.37 higher<br>(0.86 to 5.88 higher) |                          | 1177<br>(10 studies)         | ⊕⊕⊕⊕<br>very low <sup>1,2,3</sup> |          |

\*The basis for the **assumed risk** (e.g. the median control group risk across studies) is provided in footnotes. The **corresponding risk** (and its 95% confidence interval) is based on the assumed risk in the comparison group and the **relative effect** of the intervention (and its 95% CI).

CI: Confidence interval;

GRADE Working Group grades of evidence  
**High quality:** Further research is very unlikely to change our confidence in the estimate of effect.  
**Moderate quality:** Further research is likely to have an important impact on our confidence in the estimate of effect and may change the estimate.  
**Low quality:** Further research is very likely to have an important impact on our confidence in the estimate of effect and is likely to change the estimate.  
**Very low quality:** We are very uncertain about the estimate.

<sup>1</sup> Of 10 studies, 2 were retrospective studies and 6 were prospective studies, and 2 were not mentioned whether retrospective studies or prospective studies  
<sup>2</sup> Total number of events is less than 300  
<sup>3</sup> Of 10 studies, 5 did not adjust for potential confounding risk factors

**Supplement figure 1.**

Begg's funnel plot with pseudo 95% confidence limits

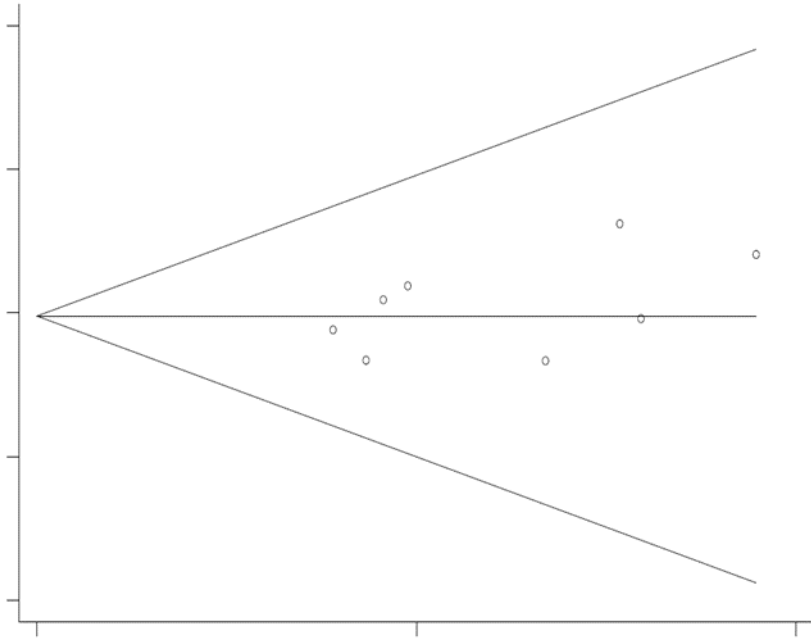

renal outcomes Begg's Test p=0.27

Begg's funnel plot with pseudo 95% confidence limits

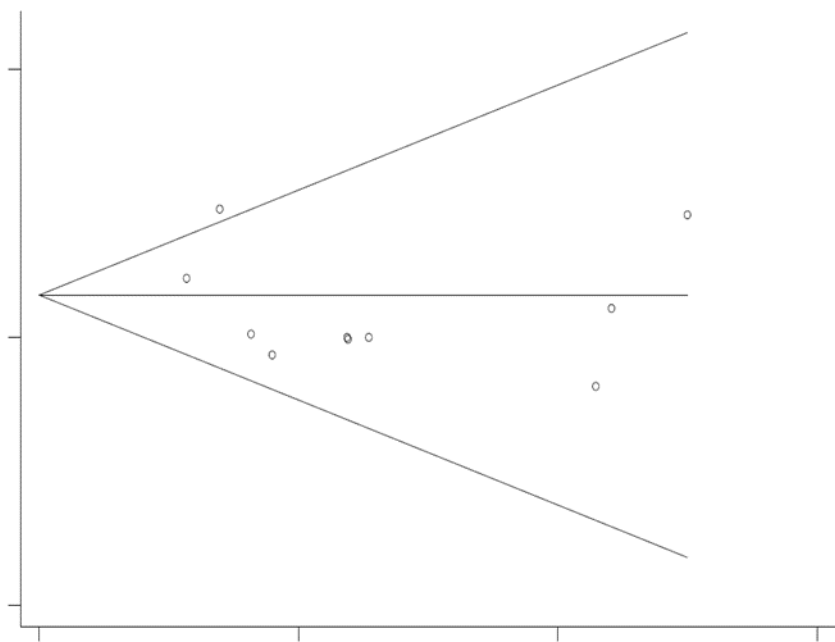

eGFR/CCr Begg's Test P=0.86
